# Supplementary material for: Human Neonatal Cardiovascular Progenitors: Unlocking the Secret to Regenerative Ability
Source: PubMed Central journal article supplement (PMC3810469; doi:10.1371/journal.pone.0077464), 2013-10-28
Supplement: pone.0077464.s003.pdf [file pone.0077464.s003.pdf]

**Table S1** – Cell surface phenotype of neonatal and adult CPCs as identified by flow cytometry.

| Surface Antigen | Neonatal CPC    | Adult CPC       | Range      |
|-----------------|-----------------|-----------------|------------|
|                 | Percent labeled | Percent labeled |            |
| CD13            | 89 ± 2%         | 98 ± 1%         | 74 – 100%  |
| CD31            | 81 ± 8%         | 43 ± 15%        | 21 – 95%   |
| CD34            | 42 ± 5%         | 25 ± 7%         | 5 – 79%    |
| CD44            | 79 ± 6%         | 89 ± 2%         | 61 – 100%  |
| CD73            | 91 ± 3%         | 88 ± 3%         | 41 – 98%   |
| CD90            | 19 ± 6%         | 32 ± 5%         | 0 – 95%    |
| CD105           | 94 ± 2%         | 92 ± 2%         | 61 – 99%   |
| CD146           | 85 ± 4%         | 96 ± 2%         | 36 – 100%  |
| C-KIT           | 23 ± 3%         | 27 ± 3%         | 3 – 52.4%  |
| CXCR4           | 37 ± 6%         | 50 ± 5%         | 13 – 72%   |
| CXCR7           | 29 ± 6%         | 44 ± 7%         | 3 – 69%    |
| HLA I           | 87 ± 4%         | 92 ± 3%         | 83 – 100 % |
| HLA II          | 4 ± 2%          | 6 ± 4%          | 0 – 34%    |
| IGF1R           | 87 ± 3%         | 89 ± 3%         | 58 – 99%   |
| KDR             | 13 ± 7%         | 35 ± 14%        | 0 – 75%    |
| PDGFR           | 20 ± 5%         | 35 ± 6%         | 2 – 58%    |
| SSEA-4          | 12 ± 6%         | 27 ± 8%         | 0 – 96%    |
