# Supplementary material for: Human Neonatal Cardiovascular Progenitors: Unlocking the Secret to Regenerative Ability
Source: PubMed Central journal article supplement (PMC3810469; doi:10.1371/journal.pone.0077464), 2013-10-28
Supplement: pone.0077464.s004.pdf [file pone.0077464.s004.pdf]

**Table S2-** Antibodies used to characterize cell surface markers expressed on neonatal and adult CPC clones.

| Antibody Against    | Fluorophore       | Company          | Clone      | Isotype        | Cat #      | Lot#       |
|---------------------|-------------------|------------------|------------|----------------|------------|------------|
| CD44                | FITC              | BD Biosciences   | L178       | MS IgG1        | 347943     | 502666     |
| CD90                | PE                | Immunotech       | F15-42-1-5 | MS IgG1        | 1840       | 3          |
| CD13                | PE                | BD Biosciences   | L138       | MS IgG1        | 347837     | 12616      |
| CD31                | PE                | BD Biosciences   | WM59       | Ms IgG1        | 555446     | 42184      |
| HLA-Dr              | PE                | BD Biosciences   | G46-6      | MS IgG2a       | 347367     | 60070      |
| CD73                | PE                | BD Biosciences   | AD2        | MS IgG1        | 550257     | 77302      |
| CD34                | PE                | BD Biosciences   | 8G12       | MS IgG1        | 348057     | 60098      |
| IGF1R               | PE                | Biologend        | 1H7/CD221  | MS IgG1        | 351805     | 8152252    |
| CD105               | PE                | Biologend        | 43A3       | MS IgG1        | 323205     | B152252    |
| CXCR7               | PE                | Biologend        | 8F11-M16   | MS IgG2b       | 331103     | B146742    |
| CD140a              | PE                | Biologend        | 16A1       | MS IgG1        | 323505     | B154801    |
| CD146               | PE                | Biologend        | SHM-57     | MS IgG2a       | 342003     | B140547    |
| CXCR4               | PE                | Biologend        | 12G5       | MS IgG2a       | 306505     | B139046    |
| SSEA4               | FITC              | Biologend        | MC-813-70  | MS IgG3        | 330409     | B153640    |
| Pan HLA             | FITC              | Biologend        | W6/32      | MS IgG2a       | 311403     | B150905    |
| CD117               | PE                | Millipore        | 104D2      | IgG1           | FCKMAB214P | 1995601    |
| CD309               | PerCP/Cy5.5       | Biologend        | HKDR-1     | MS IgG1        | 338915     | B155679    |
| IgG1                | PE                | BD Biosciences   | G18-145    | MS IgG1        | 555787     | 0000028013 |
| IgG1                | FITC              | Sigma-Aldrich    | MOPC 21    | MS IgG1        | F6397      | 015K4830   |
| IgG1                | PerCP             | Biologend        | MOPC 21    | MS IgG1        | 40018      | B137528    |
| ISL1                | Mouse Monoclonal  | Abcam            | 1H9        | MS IgG1        | Ab86472    | GR120150-1 |
| vWF                 | Rabbit Polyclonal | Dako             | Polyclonal | n/a            | A0082      | 00088175   |
| SMA                 | Mouse Monoclonal  | Dako             | 1A4        | MS IgG2a kappa | M0851      | 00087780   |
| Goat anti mouse IgG | FITC              | Southern Biotech | Polyclonal | IgG            | 1030-02    | D240-U141C |
| Goat anti Rabbit Ig | FITC              | BD Biosciences   | Polyclonal | Ig             | 554020     | 2200705    |
