# Supplementary material for: Human Neonatal Cardiovascular Progenitors: Unlocking the Secret to Regenerative Ability
Source: PubMed Central journal article supplement (PMC3810469; doi:10.1371/journal.pone.0077464), 2013-10-28
Supplement: pone.0077464.s005.pdf [file pone.0077464.s005.pdf]

**Table S3** – Relative expression of significantly altered microRNAs in neonatal and adult cardiovascular progenitors.

| MicroRNA   | Fold Change |               | St Error   |               | P value |
|------------|-------------|---------------|------------|---------------|---------|
|            | Adult CPCs  | Neonatal CPCs | Adult CPCs | Neonatal CPCs |         |
| miR-22     | 1           | 26.87         | 0.01       | 0.16          | 0.0052  |
| miR-424    | 1           | 23.92         | 0.02       | 0.25          | 0.0357  |
| miR-20a    | 1           | 20.03         | 0.02       | 0.18          | 0.0084  |
| miR-18a    | 1           | 14.74         | 0.03       | 0.44          | 0.0238  |
| miR-20b    | 1           | 13.01         | 0.02       | 0.24          | 0.0351  |
| miR-17     | 1           | 12.45         | 0.03       | 0.18          | 0.0094  |
| miR-15a    | 1           | 9.48          | 0.08       | 0.23          | 0.0368  |
| miR-103    | 1           | 8.70          | 0.05       | 0.13          | 0.0027  |
| miR-24     | 1           | 8.41          | 0.05       | 0.10          | 0.0005  |
| let-7i     | 1           | 6.53          | 0.03       | 0.37          | 0.0238  |
| miR-106b   | 1           | 4.98          | 0.09       | 0.20          | 0.0295  |
| miR-185    | 1           | 3.52          | 0.06       | 0.10          | 0.0022  |
| miR-130a   | 1           | 2.41          | 0.28       | 0.08          | 0.0288  |
| let-7e     | 1           | 2.23          | 0.17       | 0.14          | 0.0456  |
| miR-192    | 2.16        | 1             | 0.11       | 0.28          | 0.0273  |
| miR-134    | 3.13        | 1             | 0.44       | 0.16          | 0.0007  |
| miR-23b    | 3.33        | 1             | 1.29       | 0.25          | 0.0395  |
| miR-503    | 4.97        | 1             | 0.89       | 0.45          | 0.0238  |
| miR-122    | 4.98        | 1             | 0.85       | 0.24          | 0.0005  |
| miR-10b    | 5.48        | 1             | 2.34       | 0.36          | 0.0279  |
| miR-219-5p | 5.98        | 1             | 1.75       | 0.27          | 0.0045  |
| miR-132    | 6.03        | 1             | 1.10       | 0.29          | 0.0005  |
| miR-215    | 6.80        | 1             | 2.70       | 0.22          | 0.0145  |
| miR-1      | 6.85        | 1             | 2.22       | 0.50          | 0.0238  |
| miR-205    | 7.65        | 1             | 2.30       | 0.29          | 0.0038  |
| miR-183    | 8.11        | 1             | 2.16       | 0.31          | 0.0020  |
| miR-498    | 8.21        | 1             | 1.40       | 0.62          | 0.0238  |
| miR-206    | 9.59        | 1             | 4.10       | 0.38          | 0.0166  |
| miR-141    | 9.70        | 1             | 4.02       | 0.27          | 0.0137  |
| miR-302a   | 9.98        | 1             | 4.20       | 0.30          | 0.0145  |
| miR-520g   | 10.30       | 1             | 1.76       | 0.33          | 0.0001  |
| miR-96     | 12.30       | 1             | 0.48       | 0.27          | <0.0001 |
| miR-208a   | 12.43       | 1             | 2.60       | 0.37          | 0.0004  |
| miR-223    | 15.90       | 1             | 3.75       | 0.22          | 0.0005  |
| miR-124    | 16.49       | 1             | 6.32       | 0.26          | 0.0074  |
| miR-150    | 16.54       | 1             | 1.97       | 0.25          | <0.0001 |
| miR-488    | 17.74       | 1             | 7.93       | 0.50          | 0.0238  |
| miR-371-3p | 21.76       | 1             | 2.38       | 0.21          | 0.0238  |
| miR-129-5p | 23.28       | 1             | 10.81      | 0.18          | 0.0163  |
| miR-196a   | 24.02       | 1             | 8.76       | 0.39          | 0.0052  |
| miR-518b   | 45.95       | 1             | 21.44      | 0.19          | 0.0150  |
