# Supplementary material for: Human Neonatal Cardiovascular Progenitors: Unlocking the Secret to Regenerative Ability
Source: PubMed Central journal article supplement (PMC3810469; doi:10.1371/journal.pone.0077464), 2013-10-28
Supplement: pone.0077464.s007.pdf [file pone.0077464.s007.pdf]

**Table S5 – Relative expression of significantly altered microRNAs in SSEA-4+ neonatal and adult cardiovascular progenitors**

| MicroRNA   | Fold Change        |                       | St Error           |                       | P value |
|------------|--------------------|-----------------------|--------------------|-----------------------|---------|
|            | SSEA-4+ Adult CPCs | SSEA-4+ Neonatal CPCs | SSEA-4+ Adult CPCs | SSEA-4+ Neonatal CPCs |         |
| miR-142-5p | 18.71              | 1                     | 4.12               | 0.18                  | 0.0127  |
| miR-371-3p | 13.36              | 1                     | 1.46               | 0.20                  | 0.0011  |
| miR-498    | 8.81               | 1                     | 1.50               | 0.21                  | 0.0067  |
| miR-223    | 7.59               | 1                     | 1.79               | 0.27                  | 0.0219  |
| miR-96     | 7.23               | 1                     | 0.28               | 0.03                  | <0.0001 |
| miR-183    | 6.81               | 1                     | 1.81               | 0.06                  | 0.0327  |
| miR-375    | 6.21               | 1                     | 1.04               | 0.20                  | 0.0079  |
| miR-520g   | 6.03               | 1                     | 1.03               | 0.28                  | 0.0091  |
| miR-150    | 5.77               | 1                     | 0.69               | 0.46                  | 0.0045  |
| miR-208a   | 5.51               | 1                     | 1.15               | 0.28                  | 0.0189  |
| miR-503    | 3.12               | 1                     | 0.56               | 0.42                  | 0.0383  |
| let-7b     | 1                  | 2.81                  | 0.15               | 0.01                  | 0.0117  |
| miR-185    | 1                  | 3.80                  | 0.06               | 0.19                  | 0.0217  |
| miR-93     | 1                  | 4.02                  | 0.10               | 0.20                  | 0.0268  |
| miR-214    | 1                  | 4.37                  | 0.09               | 0.14                  | 0.0101  |
| miR-378    | 1                  | 6.00                  | 0.12               | 0.21                  | 0.0259  |
| miR-106b   | 1                  | 7.91                  | 0.06               | 0.07                  | 0.0006  |
| miR-24     | 1                  | 10.63                 | 0.04               | 0.13                  | 0.0027  |
| miR-7      | 1                  | 12.59                 | 0.04               | 0.32                  | 0.0476  |
| miR-103    | 1                  | 14.18                 | 0.03               | 0.17                  | 0.0062  |
| miR-17     | 1                  | 16.46                 | 0.02               | 0.12                  | 0.0013  |
| miR-20b    | 1                  | 17.50                 | 0.01               | 0.28                  | 0.0268  |
| miR-22     | 1                  | 27.81                 | 0.01               | 0.32                  | 0.0412  |
| miR-20a    | 1                  | 31.21                 | 0.01               | 0.04                  | <0.0001 |
| miR-18a    | 1                  | 31.89                 | 0.02               | 0.25                  | 0.0174  |
| miR-424    | 1                  | 57.54                 | 0.01               | 0.18                  | 0.0058  |
