# Supplementary material for: Human Neonatal Cardiovascular Progenitors: Unlocking the Secret to Regenerative Ability
Source: PubMed Central journal article supplement (PMC3810469; doi:10.1371/journal.pone.0077464), 2013-10-28
Supplement: pone.0077464.s008.pdf [file pone.0077464.s008.pdf]

**Table S6 – Primers used to detect gene expression by PCR**

| Gene         | Forward Primer           | Reverse Primer         |
|--------------|--------------------------|------------------------|
| ATM          | GGGCGAGCCGCAAACGCTAA     | TTCGGCCCGTCCGAGCAAAC   |
| C-KIT        | ATTCCCAAGCCCATGAGTCCTTGA | ACACGTGGAACACCATCCT    |
| E2F1         | GACCATCAGTACCTGGCCGAGAG  | GACGACACCGTCAGCCGAGTG  |
| GAPDH        | TGCACCACCAACTGCTTAGC     | GGCATGGACTGTGGTCATGAG  |
| GATA 4       | GATCTTCGCGACAGTTCCTC     | GTCCCCGGGAAGGAGAAG     |
| ISL1         | CACAAGCGTCTCGGGATTGTGTTT | AGTGGCAAGTCTTCCGACAA   |
| MHC $\alpha$ | GTCATTGCTGAAACCGAGAATG   | GCAAAGTACTGGATGACACGCT |
| MLC-2v       | TATTGGAACATGGCCTCTGGAT   | GGTGCTGAAGGCTGATTACGTT |
| MYC          | AAGACAGCGGCAGCCCGAAC     | TGGGCGAGCTGCTGTCGTTG   |
| RAD50        | CTACGGCTTTGCGTCCCCGG     | ACACCAGCTGCTTTCCCCGC   |
| TROP T       | GTGGGAAGAGGCAGACTGAG     | ATAGATGCTCTGCCACAGC    |
